# Supplementary material
Source: publisher site journal article supplement (https://www.spandidos-publications.com/5402/downloadSupplementary)
Supplement: Supplementary file 1 [file downloadSupplementary]

Figure S1. Summary of risk of bias. (A) Risk of bias graph. Each risk of bias item is presented as a percentage across all included studies and indicates the proportional level for each risk of bias item. (B) Risk of bias. The methodological quality of the included studies according to a risk of bias tool that assessed randomization (sequence generation and allocation concealment), blinding (participants, personnel and outcome assessors), completeness of outcome data, selection of outcomes reported and other sources of bias.

A

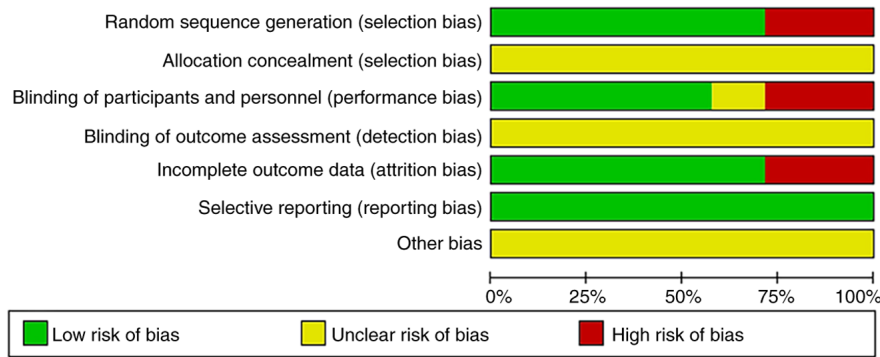

B

|                      | Random sequence generation (selection bias) | Allocation concealment (selection bias) | Blinding of participants and personnel (performance bias) | Blinding of outcome assessment (detection bias) | Incomplete outcome data (attrition bias) | Selective reporting (reporting bias) | Other bias |
|----------------------|---------------------------------------------|-----------------------------------------|-----------------------------------------------------------|-------------------------------------------------|------------------------------------------|--------------------------------------|------------|
| Hasegawa 2020        | +                                           | ?                                       | ?                                                         | ?                                               | +                                        | +                                    | ?          |
| Ricket 2017          | +                                           | ?                                       | +                                                         | ?                                               | +                                        | +                                    | ?          |
| Sakaura 2021         | -                                           | ?                                       | -                                                         | ?                                               | -                                        | +                                    | ?          |
| Schnake 2020         | +                                           | ?                                       | +                                                         | ?                                               | +                                        | +                                    | ?          |
| Singhatanadgige 2022 | +                                           | ?                                       | +                                                         | ?                                               | -                                        | +                                    | ?          |
| Willum 2019          | +                                           | ?                                       | +                                                         | ?                                               | +                                        | +                                    | ?          |
| Yao 2021             | -                                           | ?                                       | -                                                         | ?                                               | +                                        | +                                    | ?          |
